# Supplementary material for: A silicone polymer modified by fluoranthene groups as a new approach for detecting nitroaromatic compounds
Source: Royal Society of Chemistry journal article supplement (doi:10.1039/c9py00787c), 2019-01-01
Supplement: c9py00787c1.pdf [file c9py00787c1.pdf]

## Supporting Information

### **Silicone Polymer Modified by Fluoranthene Groups as a New Approach for Detecting Nitroaromatic Compounds**

Yan Liang<sup>a,b\*</sup>, Lingxia Xu<sup>c</sup>, Fusheng Qu<sup>a</sup>, Ke Tang<sup>c</sup>, Hua Wang<sup>d\*</sup>, William W. Yu<sup>d</sup>

a College of Food Science and Engineering, Qilu University of Technology (Shandong Academy of Sciences), Jinan, Shandong 250353, People's Republic of China.

b Weihai New Era Chemical CO., LTD, Weihai, Shandong 264205, People's Republic of China.

c College of Biotechnology, Qilu University of Technology (Shandong Academy of Sciences), Jinan, Shandong 250353, People's Republic of China.

d Department of Chemistry and Physics, Louisiana State University, Shreveport, LA 71115, US.

\* [liangyan@qlu.edu.cn](mailto:liangyan@qlu.edu.cn) (Yan Liang)

[hwang@lsus.edu](mailto:hwang@lsus.edu) (Hua Wang)

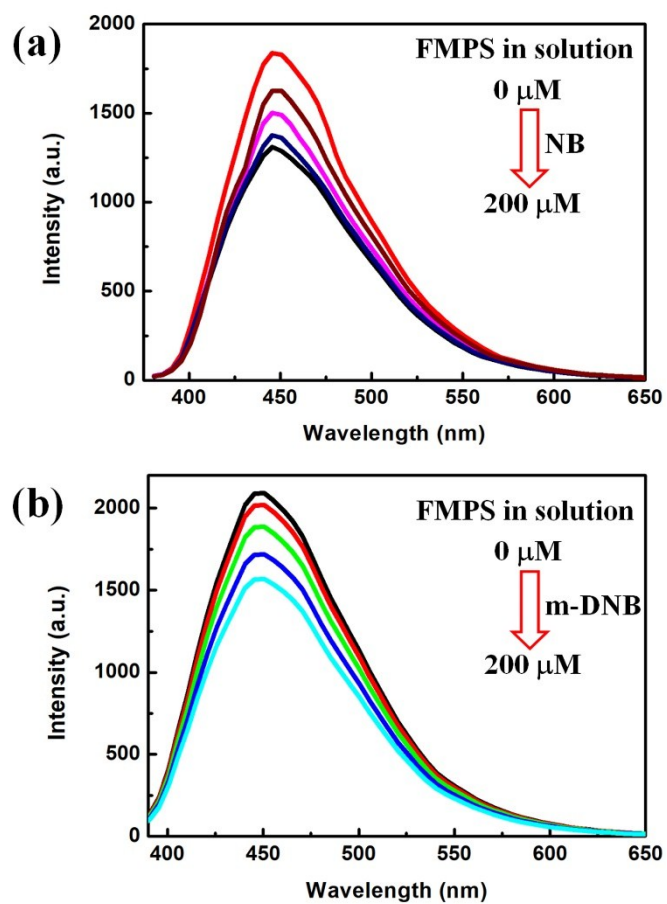

Fig. S1 PL spectra of **FMPS** containing different amounts of NB (a) and m-DNB (b) in THF solution.

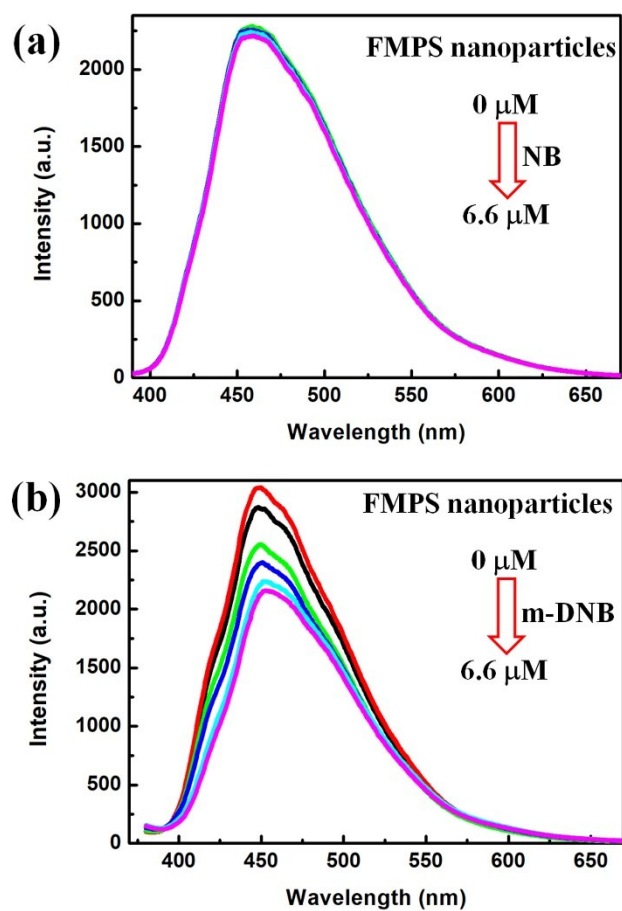

Fig. S2 PL spectra of FMPS nanoparticles containing different amounts of NB (a) and m-DNB (b).
